# Supplementary material for: LEA Gene Expression Assessment in Advanced Mutant Rice Genotypes under Drought Stress
Source: Hindawi journal article supplement (doi:10.1155/2019/8406036), 2019-12-27
Supplement: f1 [file 8406036.f1.pdf]

## Supplementary Materials:

**Table S1.** List of total *LEA* genes available in National Center of Biotechnology Information (NCBI) (Access online at 18<sup>th</sup> February 2016)

| No. | Gene name           | Chromosome | Gene ID | NCBI file |
|-----|---------------------|------------|---------|-----------|
| 1   | <i>Os04g0589800</i> | 4          | 4336815 | LEA_1     |
| 2   | <i>Os06g0110200</i> | 6          | 4339887 | LEA_1     |
| 3   | <i>Os06g0324400</i> | 6          | 4340902 | LEA_1     |
| 4   | <i>Os08g0327700</i> | 8          | 4345287 | LEA_1     |
| 5   | <i>Os04g0685300</i> | 4          | 4337461 | LEA_2     |
| 6   | <i>Os04g0416700</i> | 4          | 4335811 | LEA_2     |
| 7   | <i>Os11g0120000</i> | 11         | 9266873 | LEA_2     |
| 8   | <i>Os12g0159600</i> | 12         | 4351561 | LEA_2     |
| 9   | <i>Os12g0159000</i> | 12         | 4351557 | LEA_2     |
| 10  | <i>Os12g0119800</i> | 12         | 4351350 | LEA_2     |
| 11  | <i>Os11g0130400</i> | 11         | 4349673 | LEA_2     |
| 12  | <i>Os09g0267400</i> | 9          | 4346564 | LEA_2     |
| 13  | <i>Os08g0494000</i> | 8          | 4345917 | LEA_2     |
| 14  | <i>Os08g0324200</i> | 8          | 4345274 | LEA_2     |
| 15  | <i>Os08g0102700</i> | 8          | 4344425 | LEA_2     |
| 16  | <i>Os07g0531500</i> | 7          | 4343454 | LEA_2     |
| 17  | <i>Os05g0584200</i> | 5          | 4339745 | LEA_2     |
| 18  | <i>Os05g0526700</i> | 5          | 4339385 | LEA_2     |
| 19  | <i>Os04g0685400</i> | 4          | 4337462 | LEA_2     |
| 20  | <i>Os04g677300</i>  | 4          | 4337404 | LEA_2     |
| 21  | <i>Os03g0843300</i> | 3          | 4334748 | LEA_2     |
| 22  | <i>Os03g0836300</i> | 3          | 4334704 | LEA_2     |
| 23  | <i>Os03g0696000</i> | 3          | 4333805 | LEA_2     |
| 24  | <i>Os03g0262700</i> | 3          | 4332329 | LEA_2     |
| 25  | <i>Os02g0538700</i> | 2          | 4329582 | LEA_2     |
| 26  | <i>Os01g0736500</i> | 1          | 4327871 | LEA_2     |
| 27  | <i>Os01g0812100</i> | 1          | 4327363 | LEA_2     |
| 28  | <i>Os01g0225600</i> | 1          | 4326740 | LEA_2     |
| 29  | <i>Os01g0624400</i> | 1          | 4326681 | LEA_2     |
| 30  | <i>Os10g0547200</i> | 10         | 4349292 | LEA_2     |
| 31  | <i>Os08g0163600</i> | 8          | 4344740 | LEA_2     |
| 32  | <i>Os07g0524200</i> | 7          | 4343421 | LEA_2     |
| 33  | <i>Os07g0206800</i> | 7          | 4342691 | LEA_2     |
| 34  | <i>Os05g0584300</i> | 5          | 4339746 | LEA_2     |
| 35  | <i>Os02g0667600</i> | 2          | 4330258 | LEA_2     |
| 36  | <i>Os02g0666600</i> | 2          | 4330251 | LEA_2     |
| 37  | <i>Os07g0272300</i> | 7          | 4342898 | LEA_2     |
| 38  | <i>Os06g0119900</i> | 6          | 4339946 | LEA_2     |
| 39  | <i>Os02g0100600</i> | 2          | 4327974 | LEA_2     |
| 40  | <i>Os01g0864500</i> | 1          | 4324791 | LEA_2     |
| 41  | <i>Os02g0564600</i> | 2          | 9267147 | LEA_3     |
| 42  | <i>Os01g0314800</i> | 1          | 4327292 | LEA_3     |
| 43  | <i>Os05g0362600</i> | 5          | 4338544 | LEA_3     |
| 44  | <i>Os03g0400700</i> | 3          | 4333058 | LEA_3     |
| 45  | <i>Os03g0322900</i> | 3          | 4332688 | LEA_4     |

**Table S1.** Continued

| <b>No.</b> | <b>Gene name</b>    | <b>Chromosome</b> | <b>Gene ID</b> | <b>NCBI file</b> |
|------------|---------------------|-------------------|----------------|------------------|
| 46         | <i>Os05g0349800</i> | 5                 | 4338499        | LEA_5            |
| 47         | <i>Os01g0702500</i> | 1                 | 4326935        | LEA_5            |
| 48         | <i>Os02g0669100</i> | 2                 | 4330265        | Dehydrin         |
| 49         | <i>Os11g0451700</i> | 11                | 4350448        | Dehydrin         |
| 50         | <i>Os11g0454200</i> | 11                | 4350453        | Dehydrin         |
| 51         | <i>Os11g0454000</i> | 11                | 4350452        | Dehydrin         |
| 52         | <i>Os11g0453900</i> | 11                | 4350451        | Dehydrin         |
| 53         | <i>Os06g0341300</i> | 6                 | 4340952        | SMP              |
| 54         | <i>Os03g0747400</i> | 3                 | 4334097        | SMP              |
| 55         | <i>Os03g0159600</i> | 3                 | 4331691        | SMP              |

**Table S2.** List of primers used for qRT-PCR amplification of LEA in rice

| Gene ID* | Gene name           | Gene symbol   | Amplicon length (bp) | Group          | Primer sequence                                                 | E    |
|----------|---------------------|---------------|----------------------|----------------|-----------------------------------------------------------------|------|
| 4335811  | <i>Os04g0416700</i> | <i>OsLEA1</i> | 101                  | LEA_2          | F: 5'-CTCCCTGTACGTCGTGAACA-3'<br>R: 5'-GCTTCTGTGTGTGCGTGTAG-3'  | 1.02 |
| 4351561  | <i>Os12g0159600</i> | <i>OsLEA2</i> | 132                  | LEA_2          | F: 5'-TAGACCTCGACGTGGCAGTA-3'<br>R: 5'-CTCCAGGTCAAGATCGACGG-3'  | 1.01 |
| 4326681  | <i>Os01g0624400</i> | <i>OsLEA3</i> | 80                   | LEA_2          | F: 5'-TAATTGTTAGCCGGCGCATC-3'<br>R: 5'-GTCCTTGATCAGCGACACGA-3'  | 0.98 |
| 4338544  | <i>Os05g0362600</i> | <i>OsLEA4</i> | 114                  | LEA_3          | F: 5'-AGCTGTGTTGCCCTGCT-3'<br>R: 5'-AATCCTCTCCTGCACCG-3'        | 1.03 |
| 4331691  | <i>Os03g0159600</i> | <i>OsLEA5</i> | 109                  | SMP            | F: 5'-ACAAGGACGCCGTGACGAT-3'<br>R: 5'-TCCCGGAGCTTGATCCTGT-3'    | 1.01 |
| AK100267 | <i>Actin 11</i>     | <i>ACT11</i>  | 67                   | Reference gene | F: 5'-GGAAGTGGTATGGTCAAGGC-3'<br>R: 5'-AGTCTCATGGATAACCCGCAG-3' | 1.04 |
| AK061988 | <i>Ubiquitin 5</i>  | <i>UBQ5</i>   | 69                   | Reference gene | F: 5'-ACCACTTCGACCGCCACTACT-3'<br>R: 5'-ACGCCTAAGCCTGCTGGTT-3'  | 1.19 |

\*Full-length cDNA gene ID; F: Forward primer sequences on full-length cDNA sequence; R: reverse primer sequences on full-length cDNA sequence; E, Amplification efficiency

**Table S3.** Analysis of variance for Cq values of candidate target *OsLEA1*, *OsLEA2*, *OsLEA3*, *OsLEA4* and *OsLEA5* genes in the rice genotypes under drought stress condition.

| Source of variation | df | Mean square   |               |               |               |               |
|---------------------|----|---------------|---------------|---------------|---------------|---------------|
|                     |    | <i>OsLEA1</i> | <i>OsLEA2</i> | <i>OsLEA3</i> | <i>OsLEA4</i> | <i>OsLEA5</i> |
| Replications        | 3  | 0.00042       | 0.000023      | 0.00002       | 0.00028       | 0.00010       |
| Genotypes           | 3  | 142.267*      | 54.775*       | 94.583*       | 29.643*       | 14.198*       |
| Error               | 9  | 0.00013       | 0.00010       | 0.00007       | 0.00014       | 0.00006       |

\*Significant level at  $p \leq 0.05$

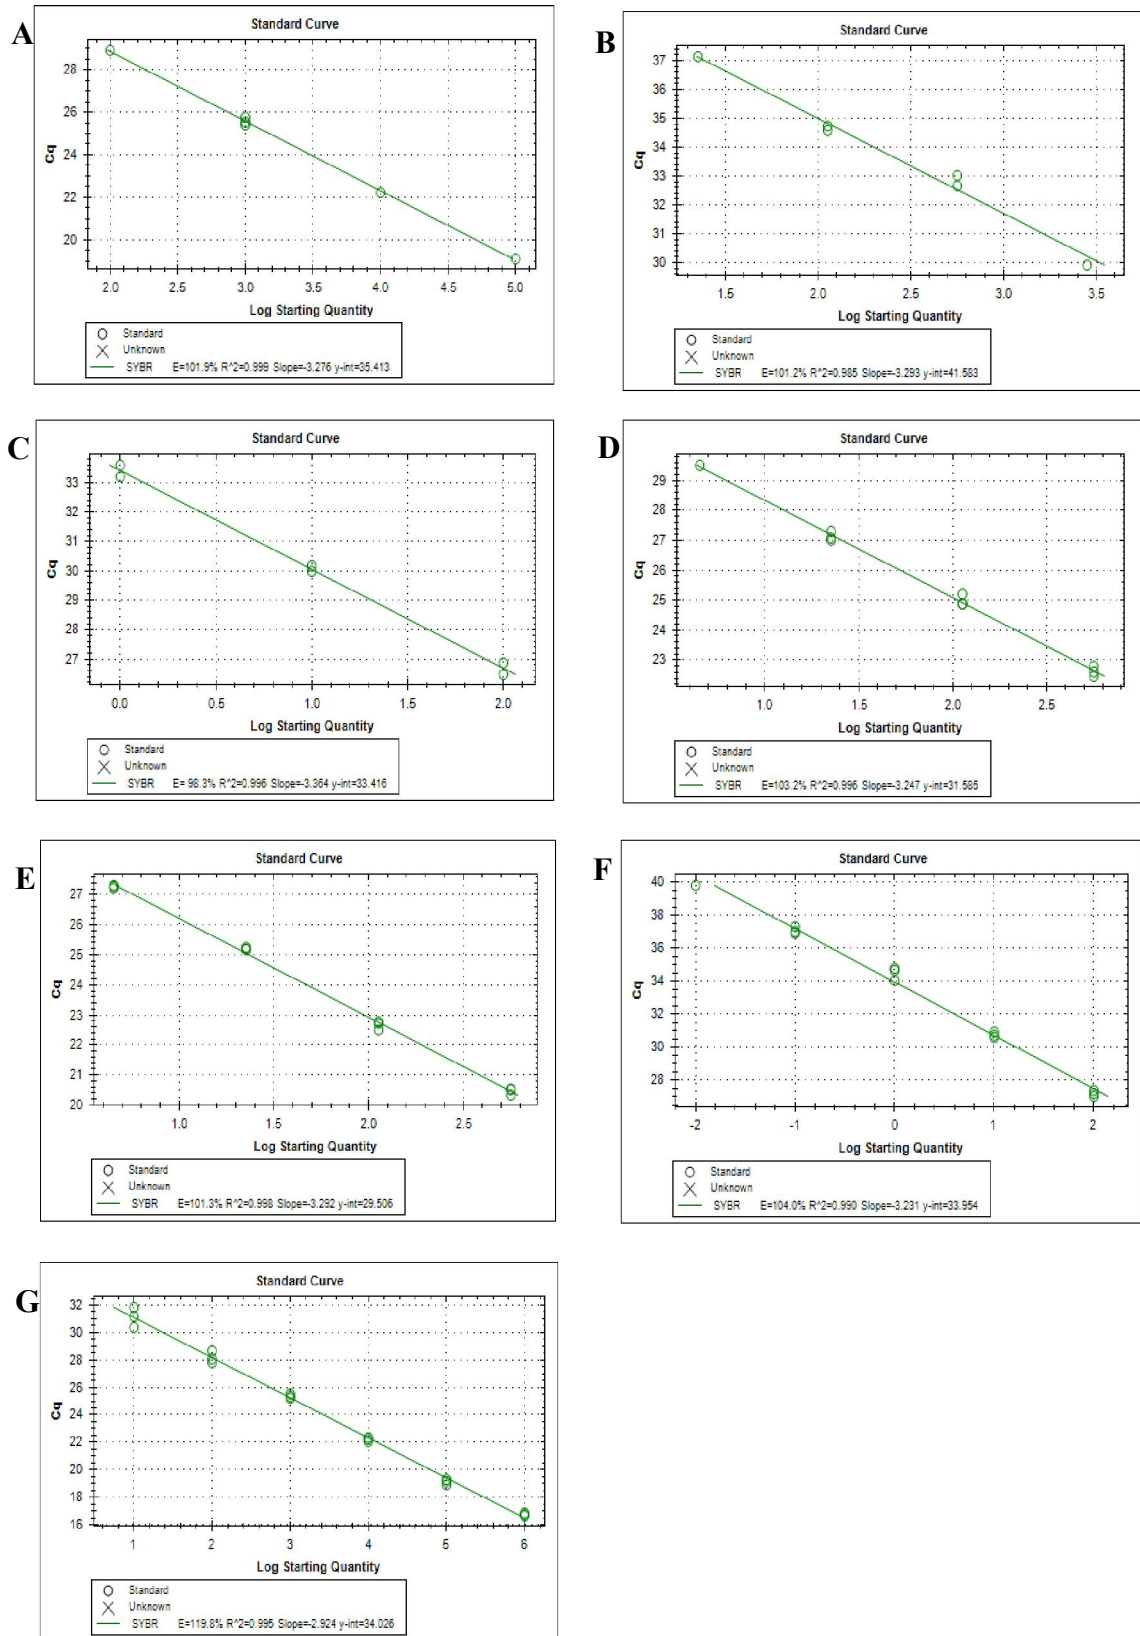

**Figure S1.** Standard curve with the C<sub>T</sub> plotted against the log of the starting quantity of cDNA template for (A) *OsLEA1*; (B) *OsLEA2*; (C) *OsLEA3*; (D) *OsLEA4*; (E) *OsLEA5*; (F) *ACT11*; (G) *UBQ5*.

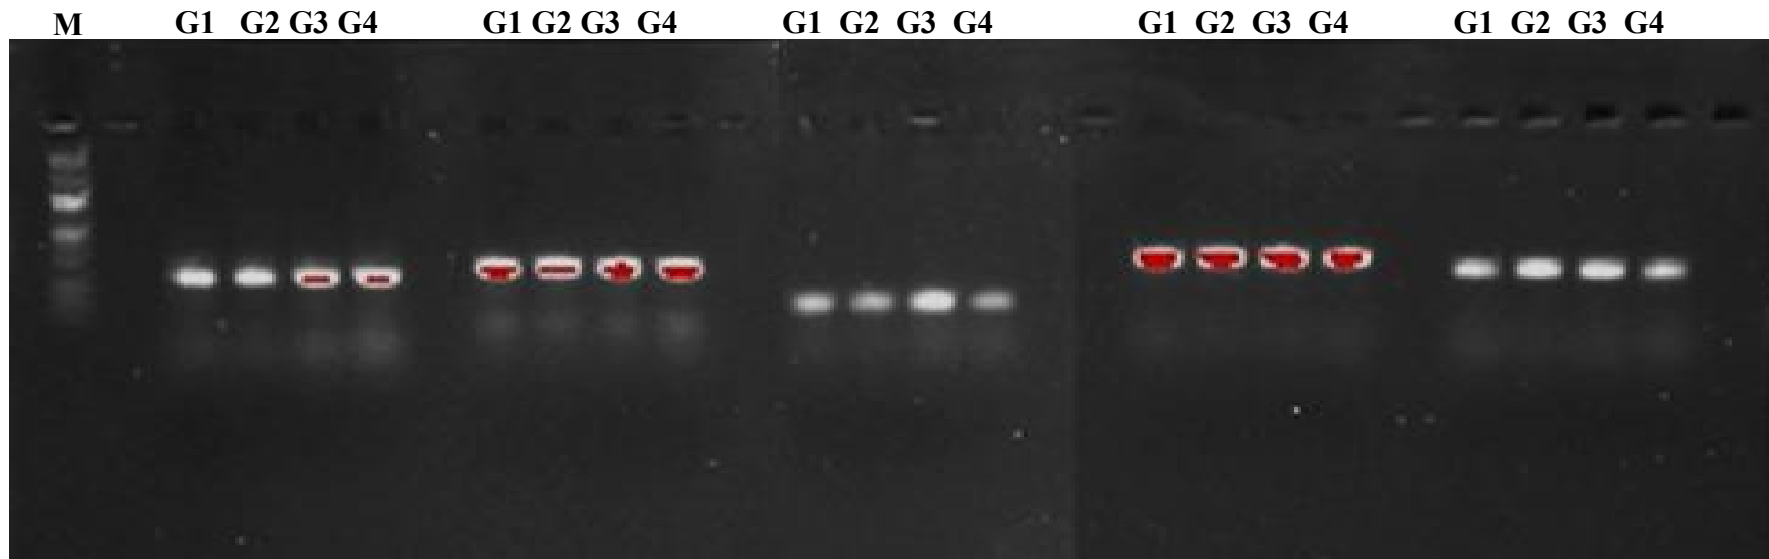

**Figure S2.** Five LEA (*OsLEA1*, *OsLEA2*, *OsLEA3*, *OsLEA4*, *OsLEA5*) genes selected from the 55 screened designed primers in all rice genotypes with running on 3% metaphor agarose gel stained with midori green (M=50 bp ladder), G1=MR219-4; G2=MR219-9; G3=MR219; G4=Aeron1

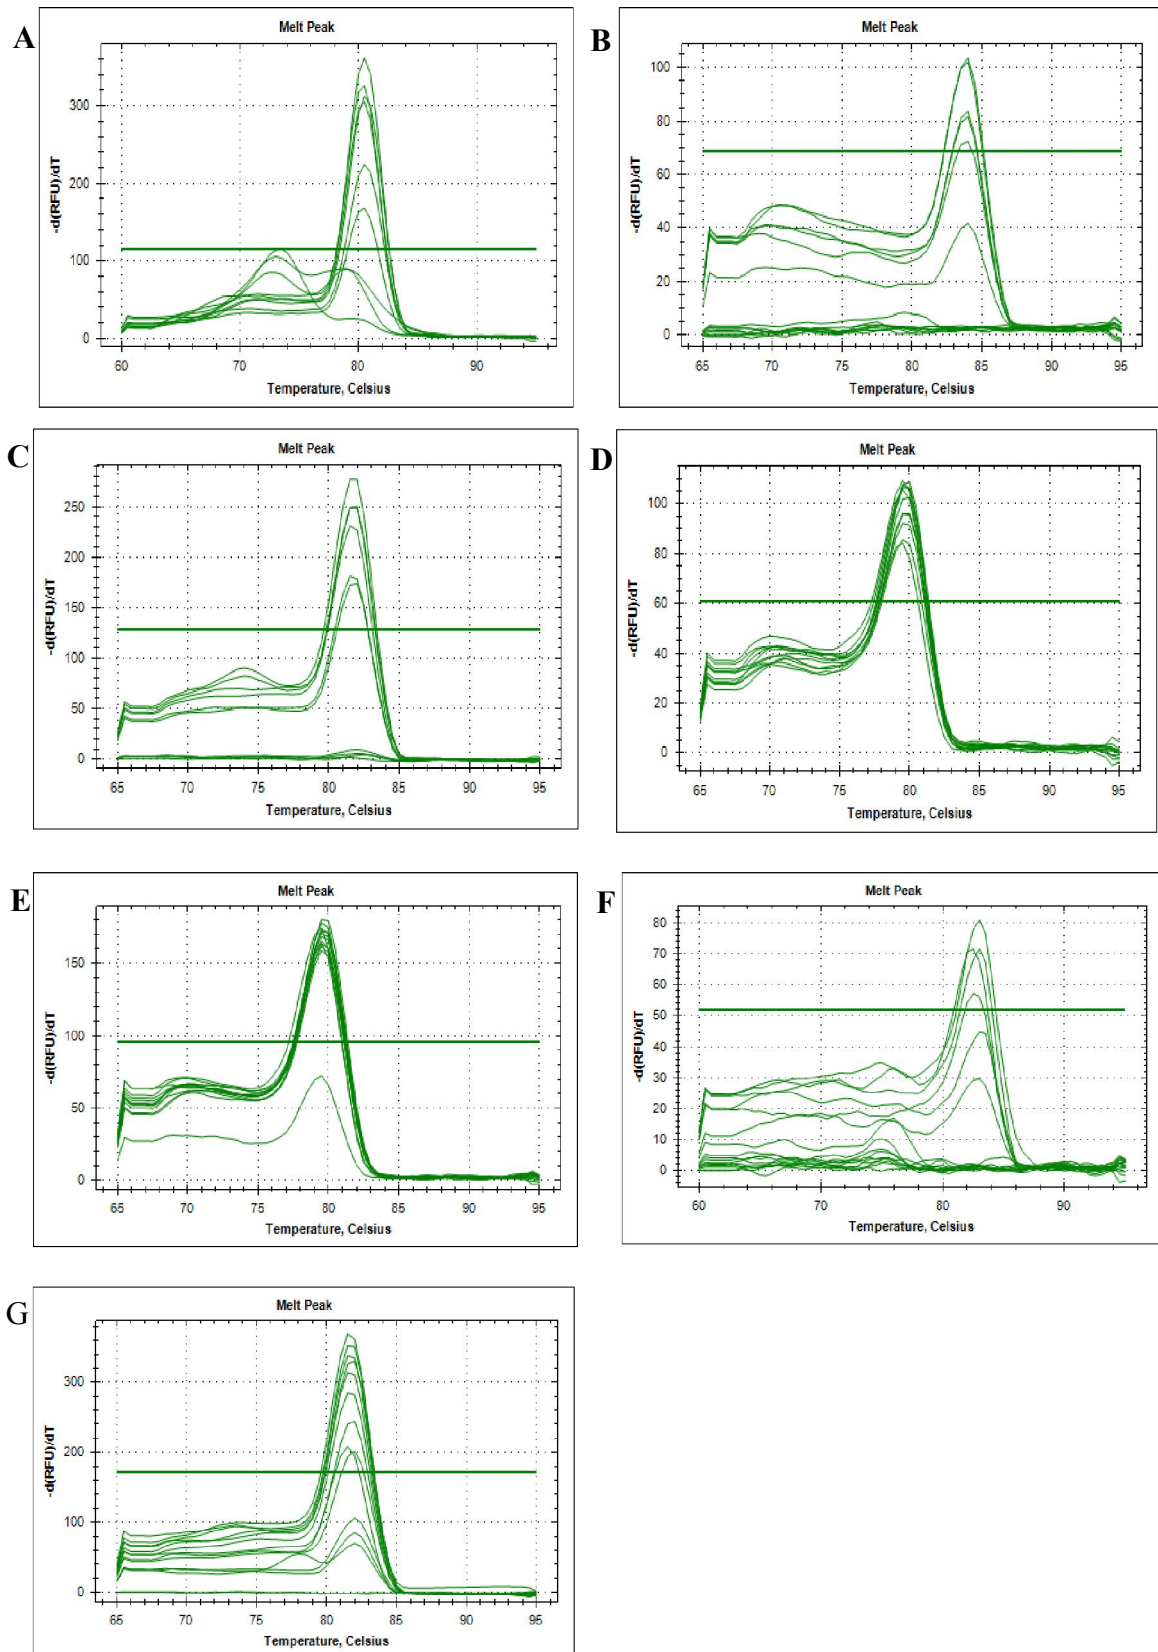

**Figure S3.** Melting curve analysis of A) *OsLEA1*, B) *OsLEA2*, C) *OsLEA3*, D) *OsLEA4*, E) *OsLEA5*, F) *ACT11* and G) *UBQ5* genes.
